# Supplementary material for: Characterisation of an Isogenic Model of Cisplatin Resistance in Oesophageal Adenocarcinoma Cells
Source: MDPI journal article supplement (doi:10.3390/ph12010033), 2019-02-20
Supplement: s1 [file s1]

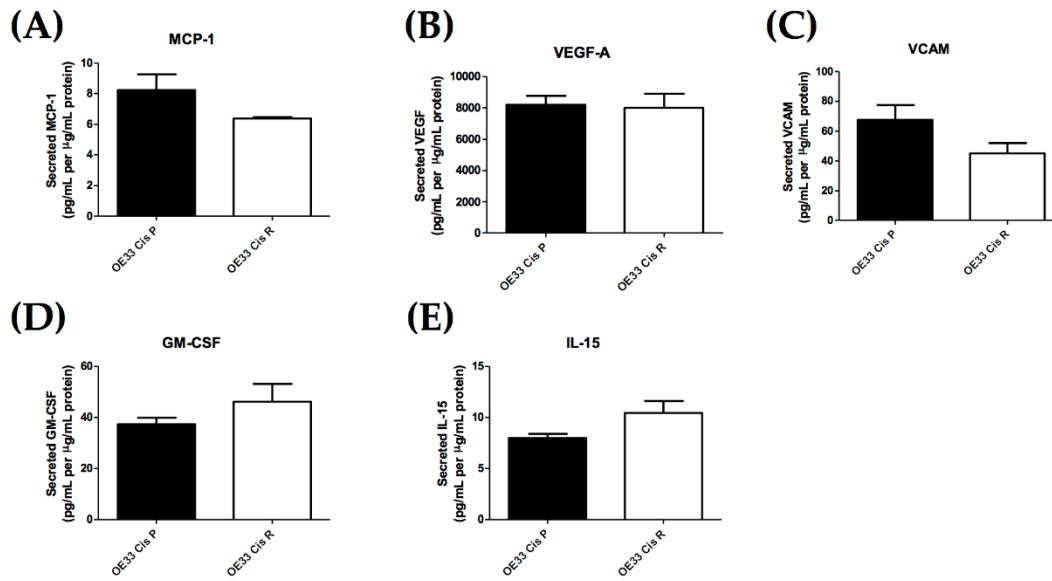

**Supplemental Figure 1.** Inflammatory protein in cisplatin sensitive (OE33 Cis P) versus cisplatin resistant (OE33 Cis R) OAC cells. The secreted levels of 47 proteins in Cis P and Cis R cells was evaluated by multiplex ELISA, 23 proteins were detected in supernatant of Cis P and Cis R cells, there was no significant difference in secreted levels of (A) Monocyte chemoattractant protein-1 (MCP-1) (B) Vascular endothelial growth factor (VEGF-A) (C) Vascular adhesion molecule 1 (VCAM-1) (D) Granulocyte-macrophage colony-stimulating factor (GM-CSF) (E) Interleukin 15 (IL-15) in OE33 Cis P and OE33 Cis R cells, all secretions normalised to protein content. (n = 4). Unpaired t-test. Data expressed as  $\pm$  SEM.
